# Supplementary material
Source: publisher figshare collection journal article supplement (https://acs.figshare.com/ndownloader/files/4661293)

**Synthesis and spectral properties of near-infrared aminophenyl-, hydroxyphenyl-,  
and phenyl-substituted heptamethine cyanines**

*Hyeran Lee, J. Christian Mason, and Samuel Achilefu\**

Department of Radiology, Washington University, St. Louis, Missouri 63110

[achilefus@mir.wustl.edu](mailto:achilefus@mir.wustl.edu)

**Supporting Information**

|                                                   |    |
|---------------------------------------------------|----|
| <sup>1</sup> H NMR spectrum of compound <b>1</b>  | 2  |
| <sup>13</sup> C NMR spectrum of compound <b>1</b> | 3  |
| LC-MS spectrum of compound <b>1</b>               | 4  |
| UV-Vis and Emission Spectra of Compound <b>1</b>  | 5  |
| <sup>1</sup> H NMR spectrum of compound <b>2</b>  | 6  |
| <sup>13</sup> C NMR spectrum of compound <b>2</b> | 7  |
| LC-MS spectrum of compound <b>2</b>               | 8  |
| UV-Vis and Emission Spectra of Compound <b>2</b>  | 9  |
| <sup>1</sup> H NMR spectrum of compound <b>3</b>  | 10 |
| <sup>13</sup> C NMR spectrum of compound <b>3</b> | 11 |
| LC-MS spectrum of compound <b>3</b>               | 12 |
| UV-Vis and Emission Spectra of Compound <b>3</b>  | 13 |
| <sup>1</sup> H NMR spectrum of compound <b>9</b>  | 14 |
| <sup>13</sup> C NMR spectrum of compound <b>9</b> | 15 |
| LC-MS spectrum of compound <b>9</b>               | 16 |
| UV-Vis and Emission Spectra of Compound <b>9</b>  | 17 |

$^1\text{H}$  NMR spectrum of compound **1**

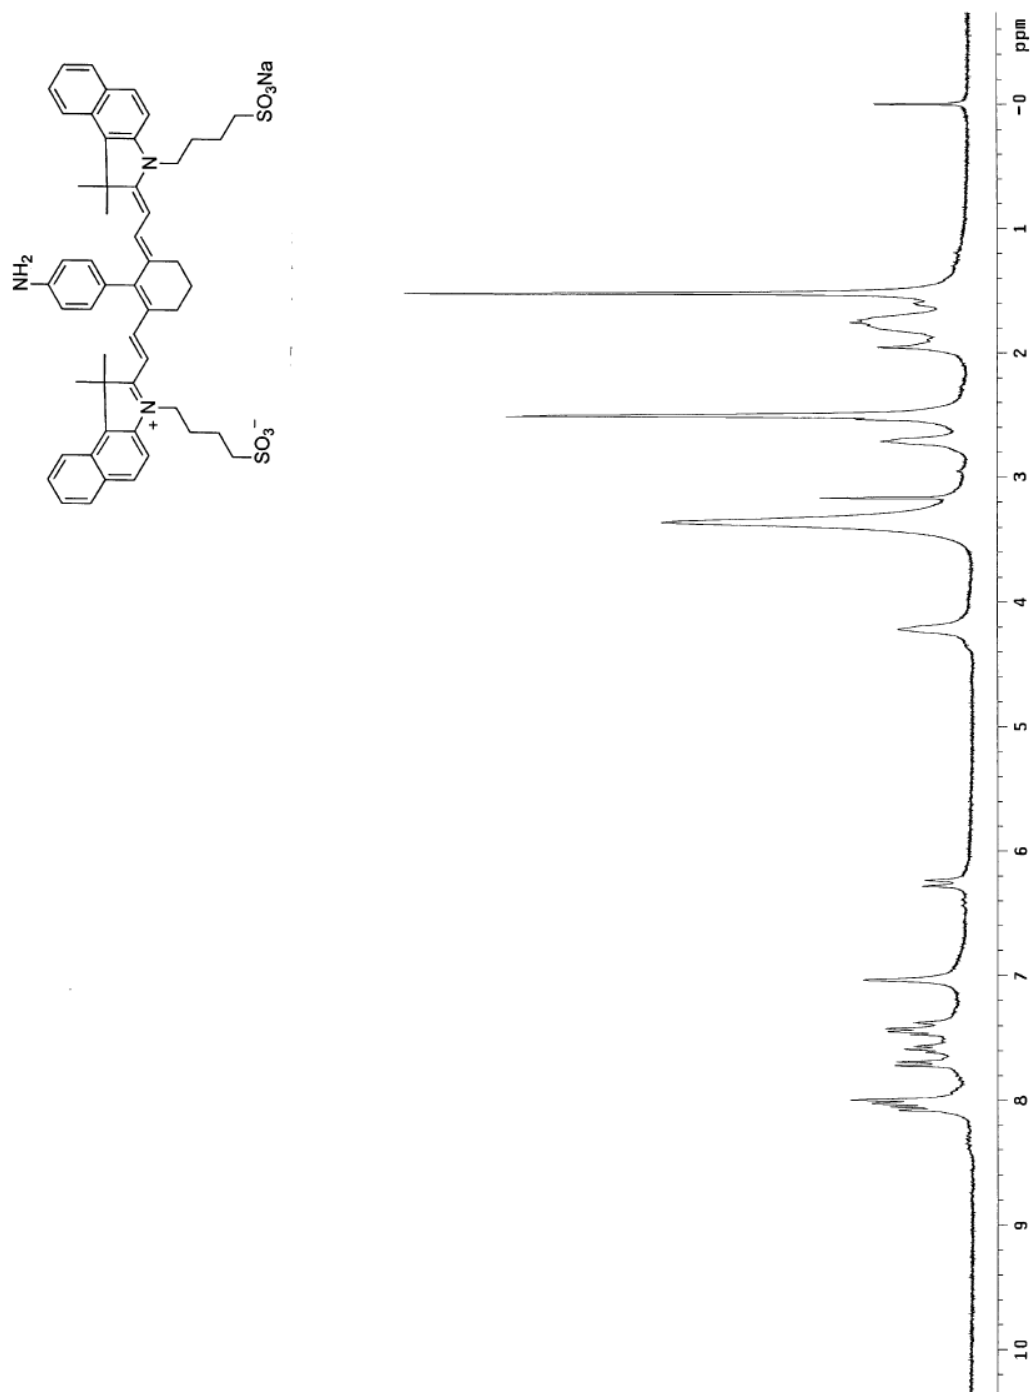

$^{13}\text{C}$  NMR spectrum of compound **1**

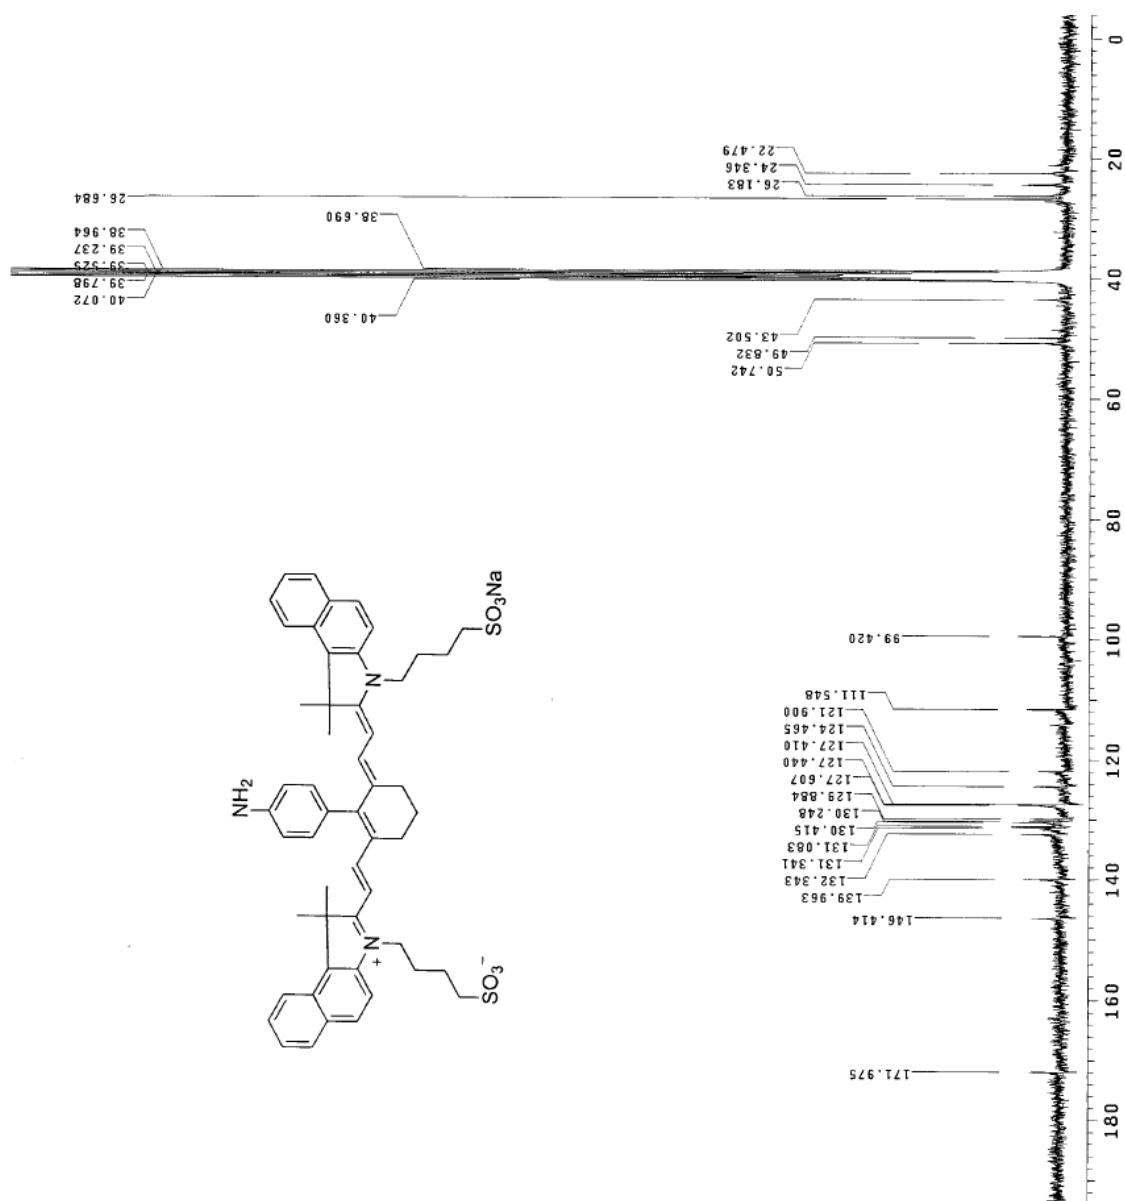

# LC-MS spectrum of compound **1**

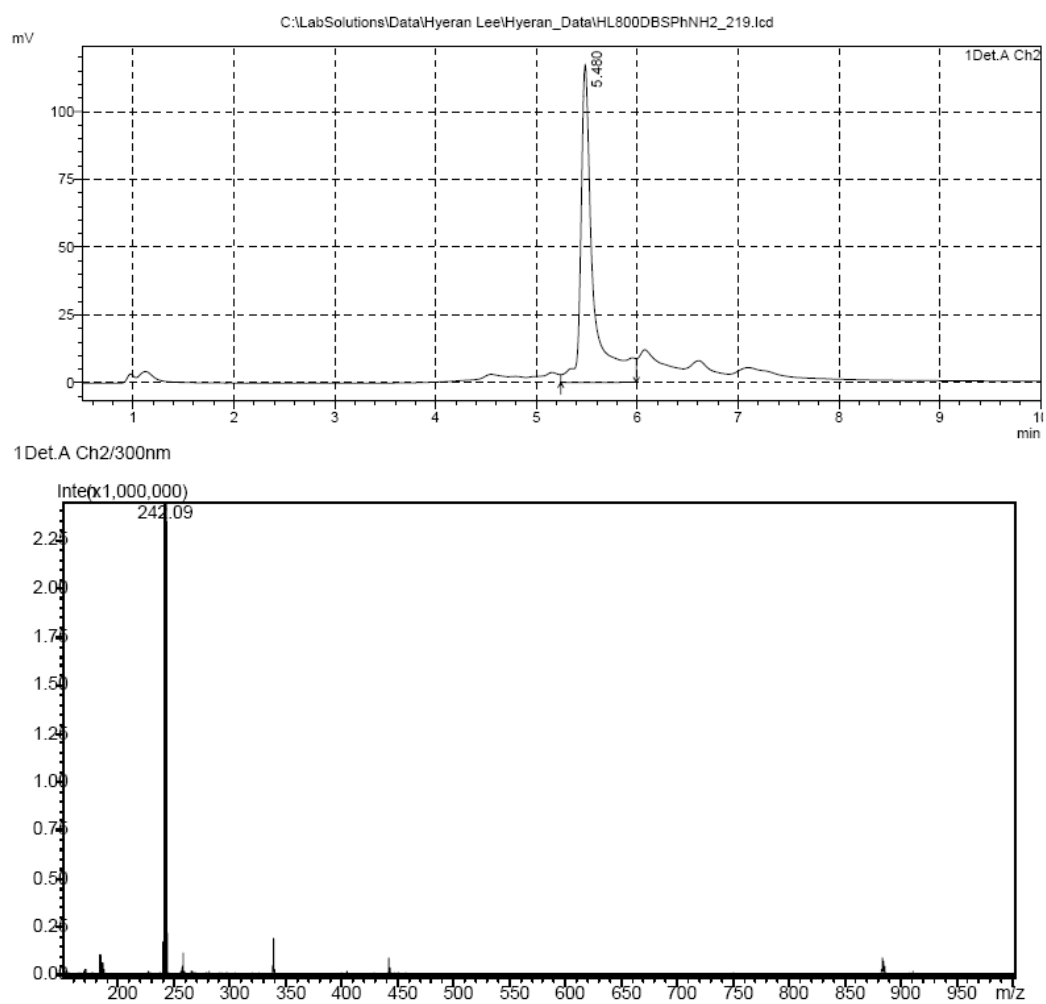

Normalized UV-Vis and Emission Spectra of Compound **1** in MeOH.

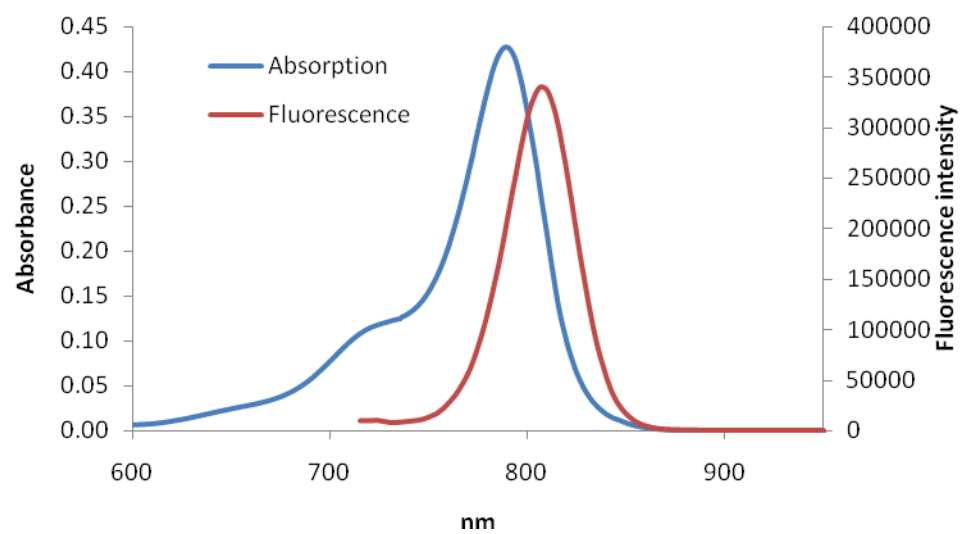

$^1\text{H}$  NMR spectrum of compound **2**

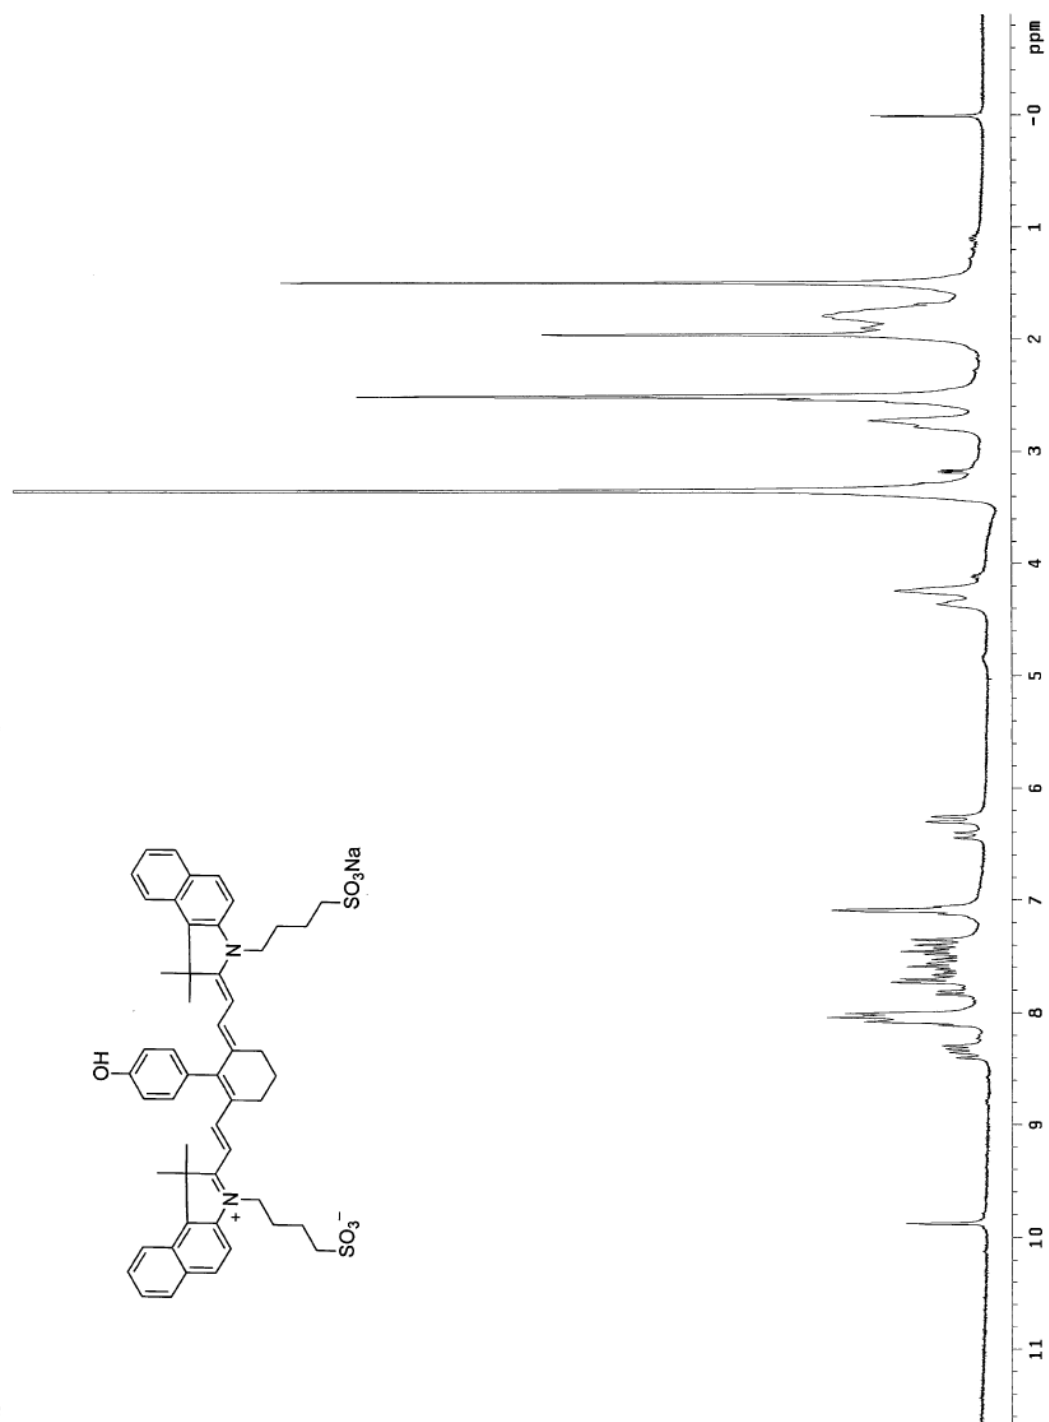

<sup>13</sup>C NMR spectrum of compound 2

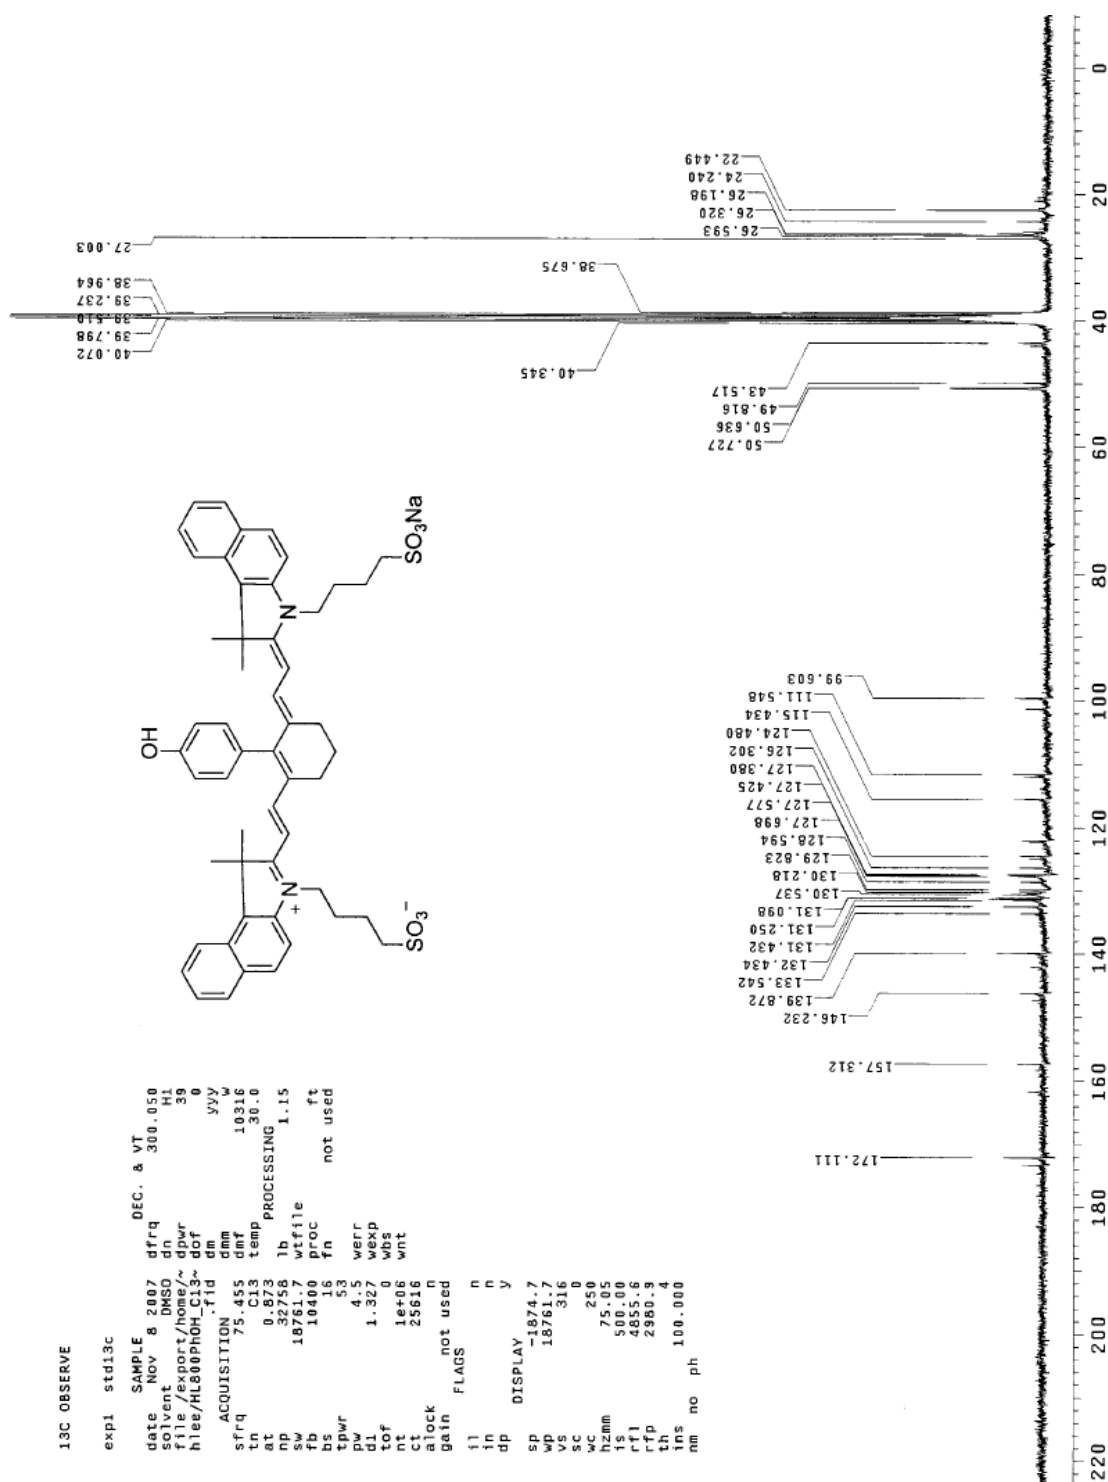

# LC-MS spectrum of compound 2

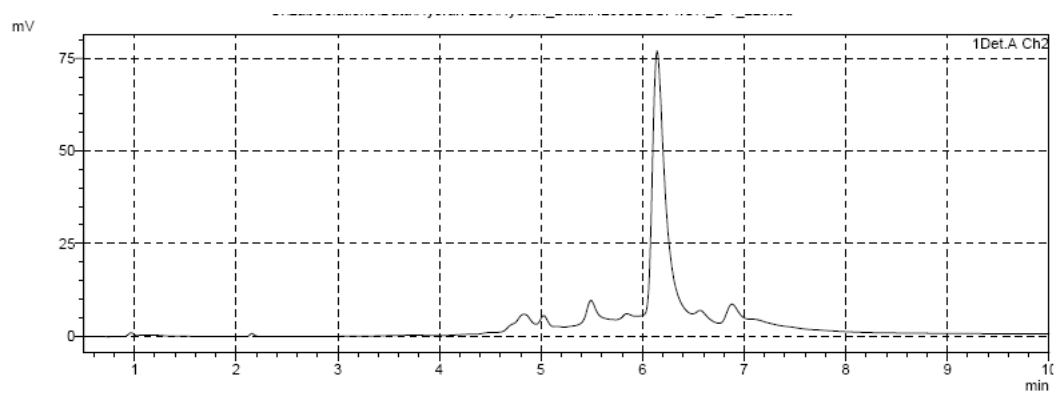

1Det.A Ch2/300nm

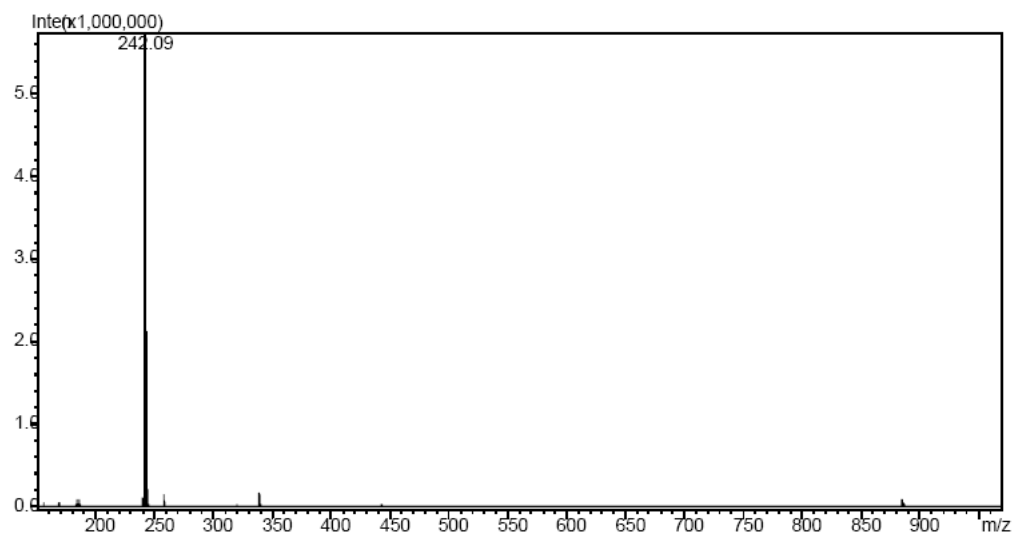



Normalized UV-Vis and Emission Spectra of Compound **2** in MeOH.

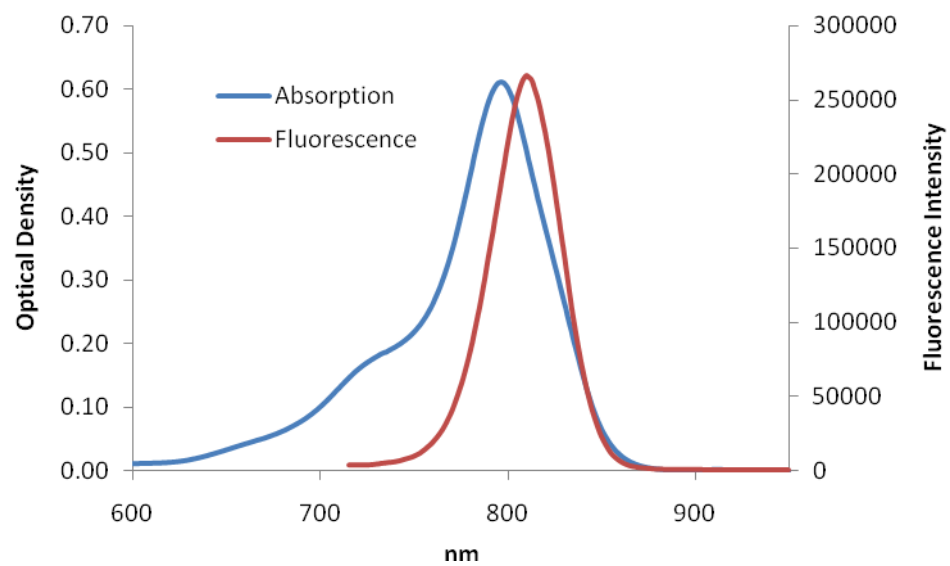

$^1\text{H}$  NMR spectrum of compound **3**

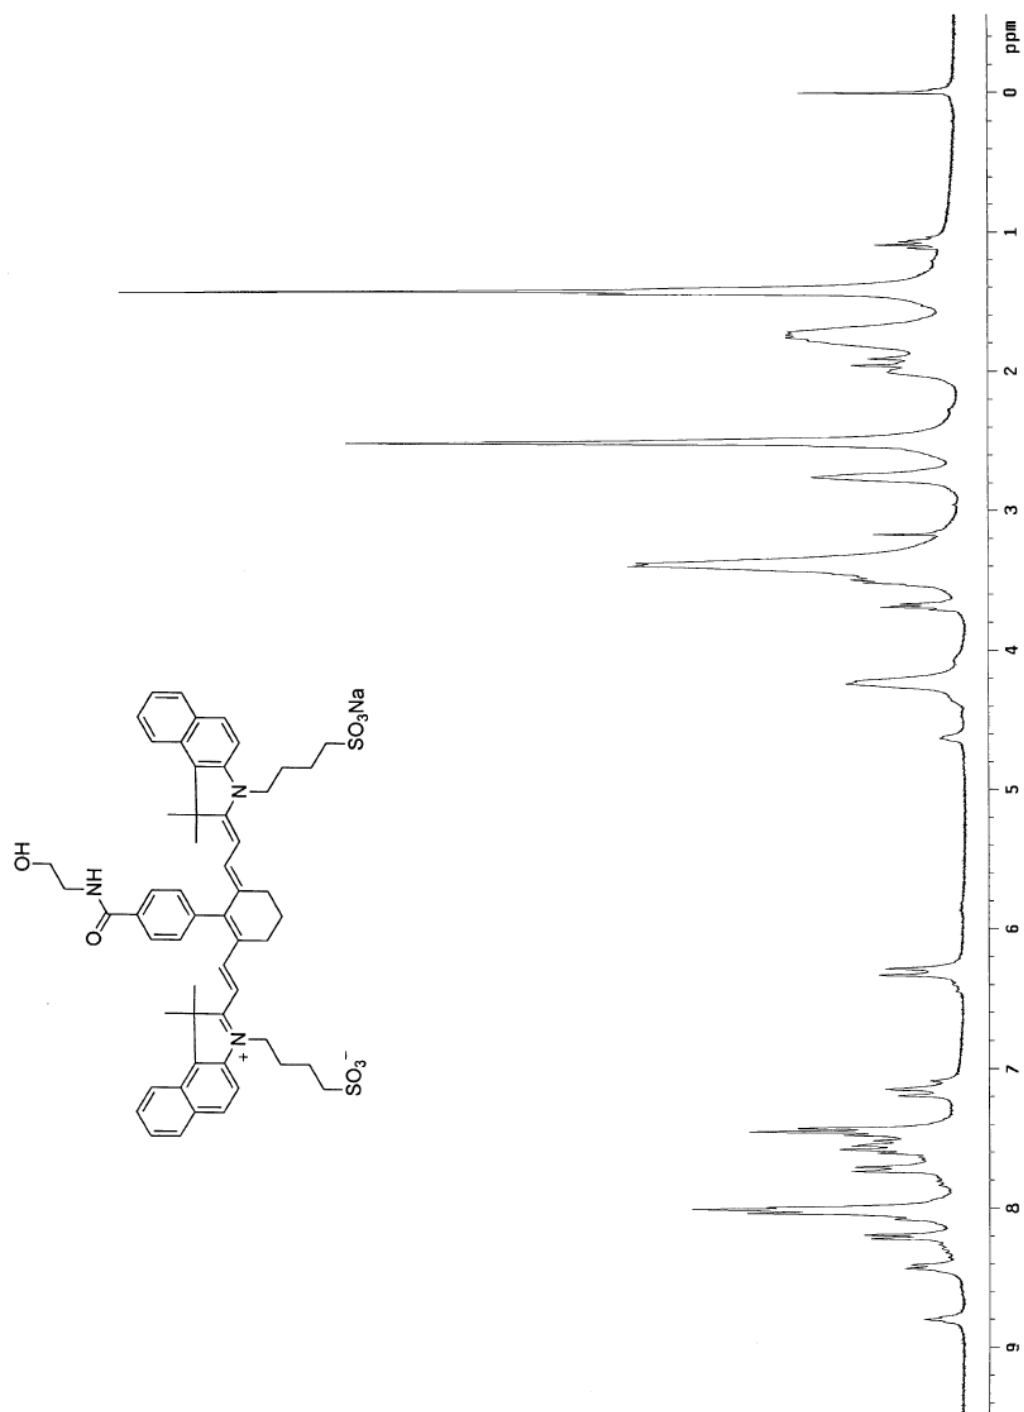

$^{13}\text{C}$  NMR spectrum of compound **3**

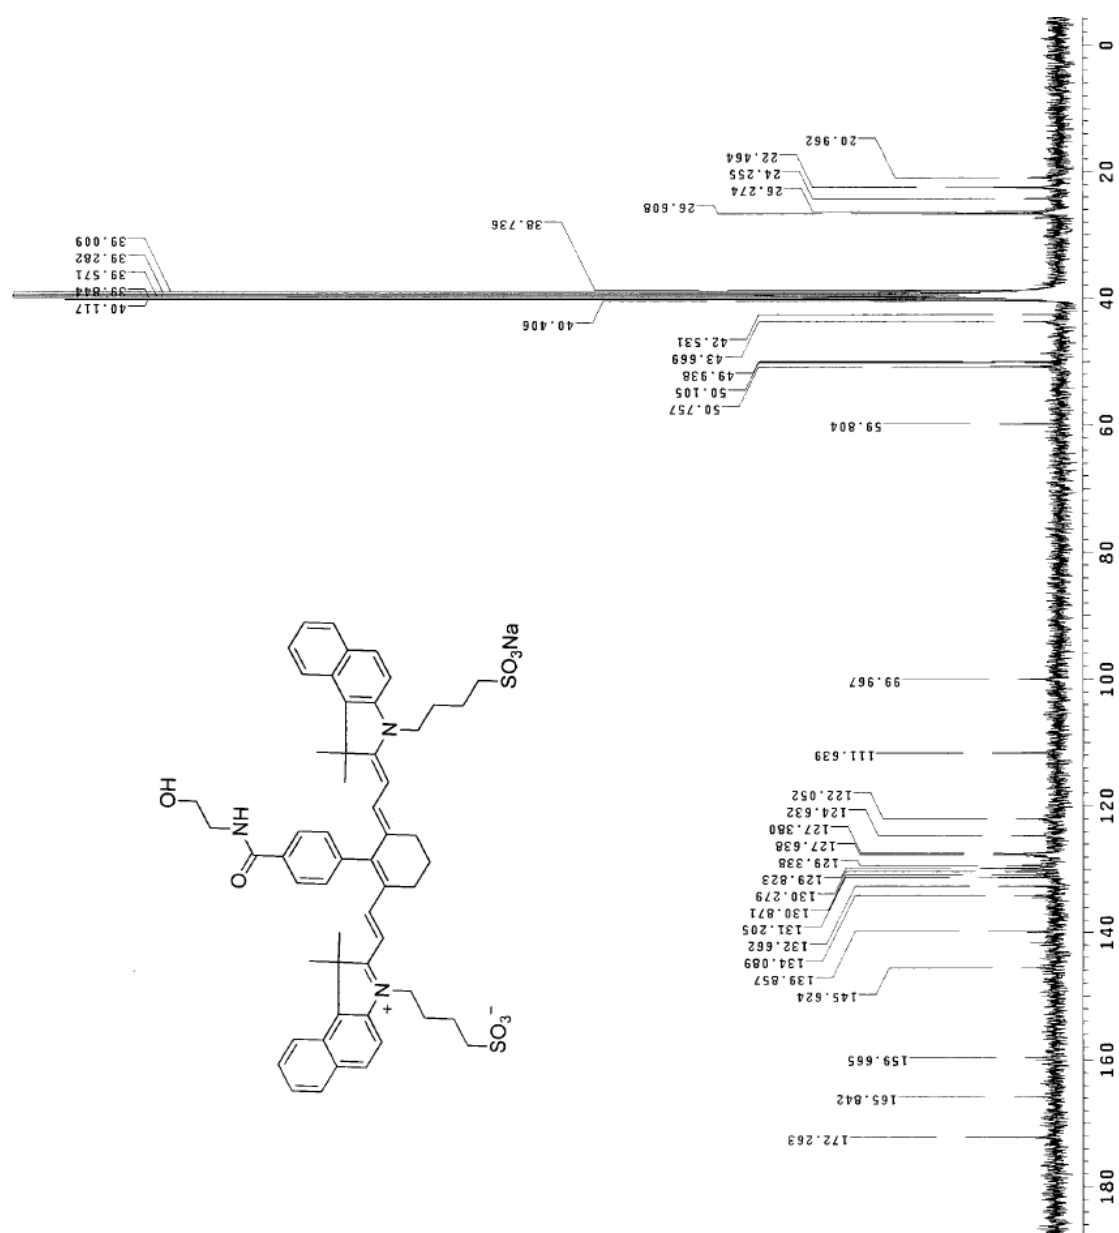

# LC-MS spectrum of compound **3**

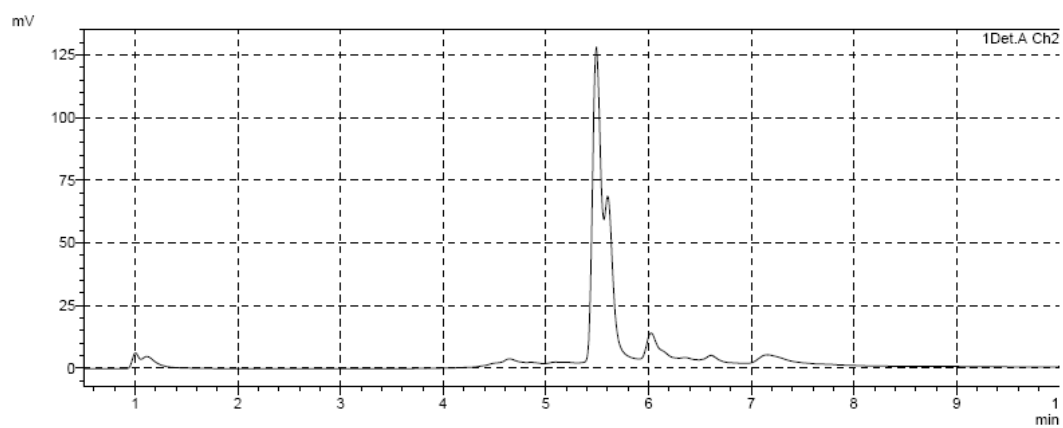

1Det.A Ch2/300nm

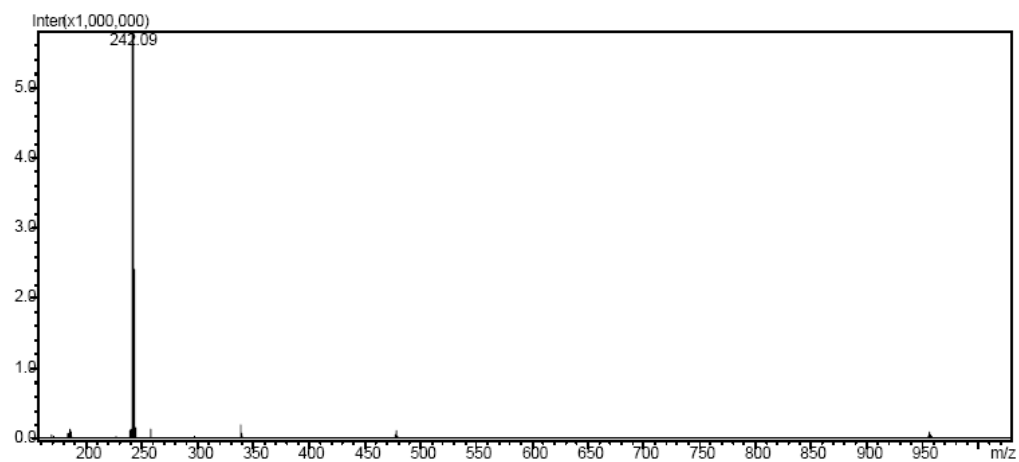

Normalized UV-Vis and Emission Spectra of Compound **3** in MeOH.

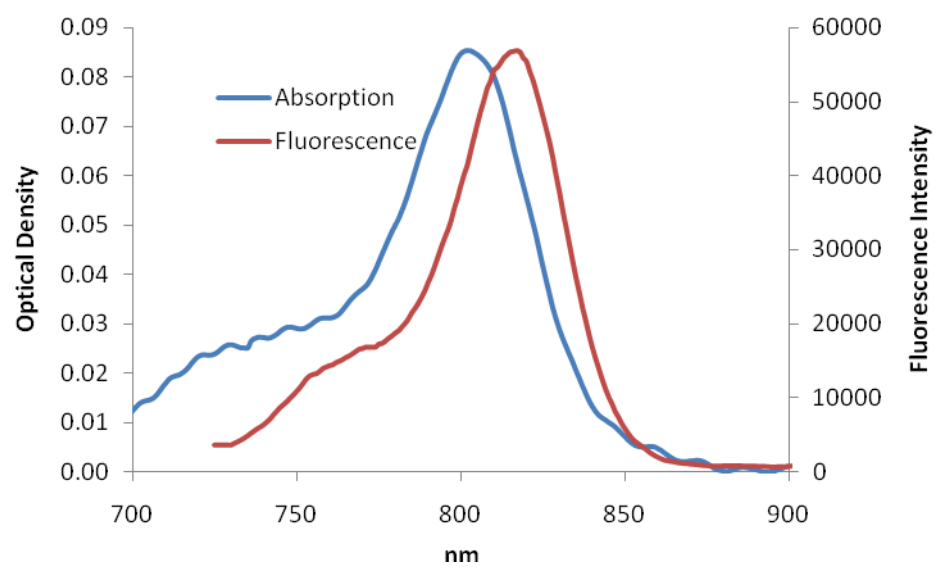

$^1\text{H}$  NMR spectrum of compound **9**.

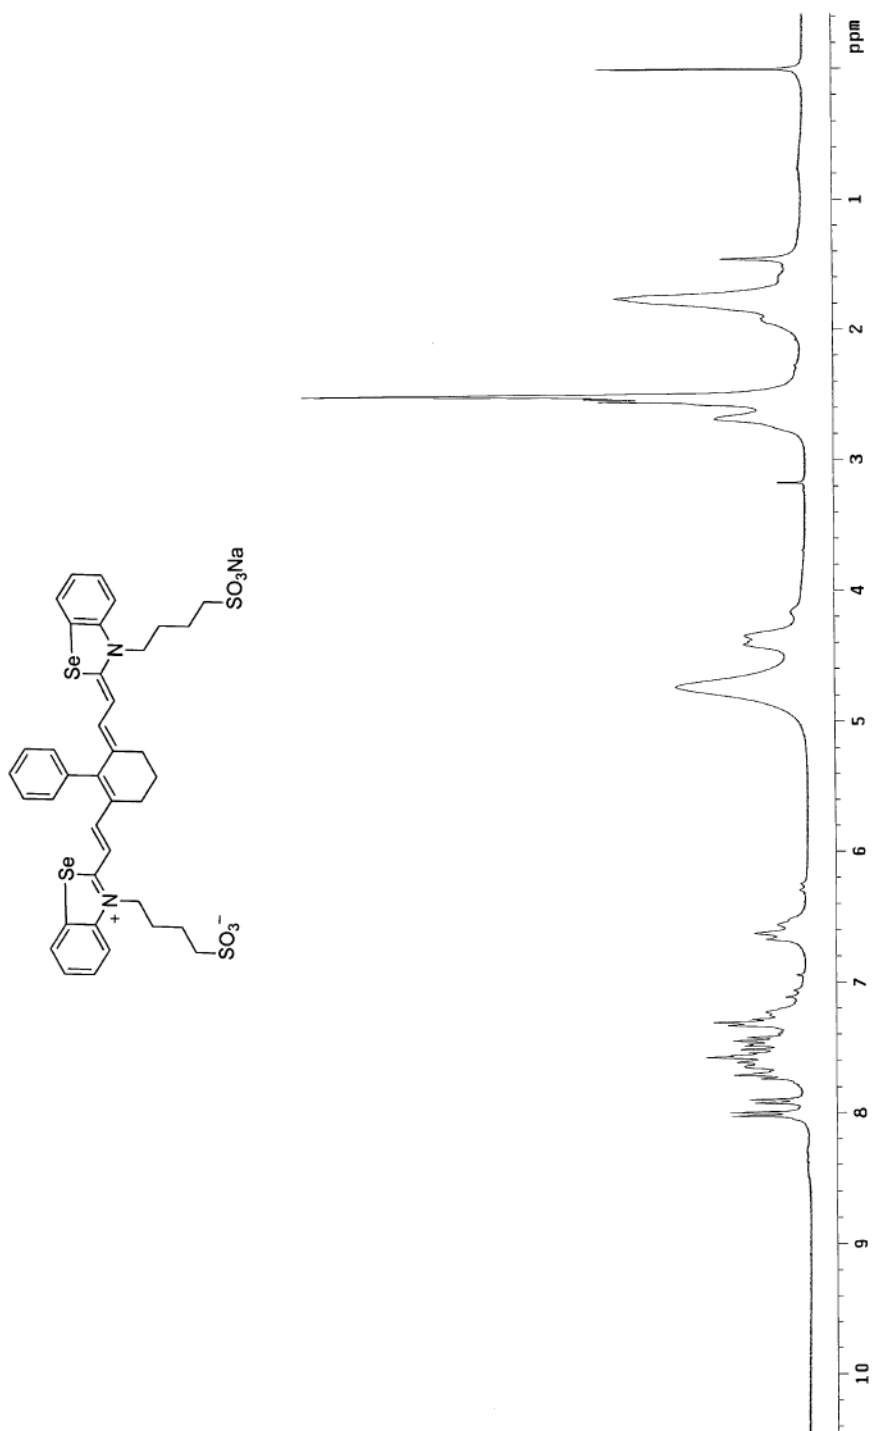

$^{13}\text{C}$  NMR spectrum of compound **3**

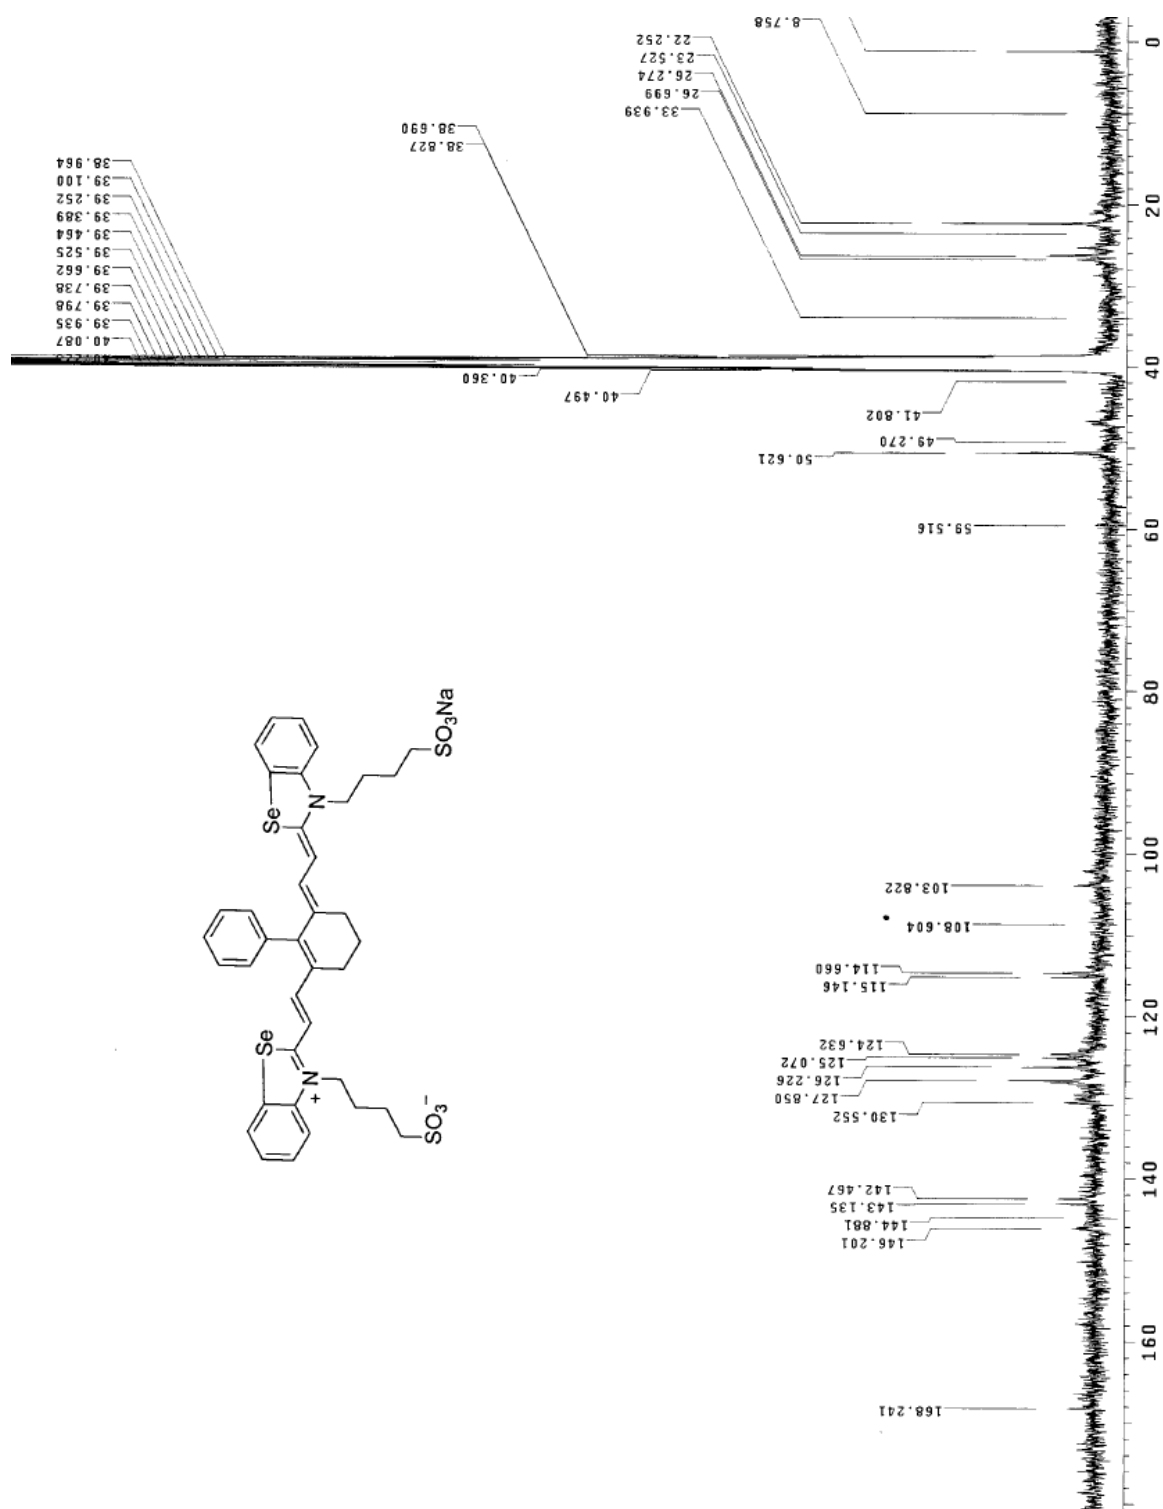

LC-MS spectrum of compound **9**.

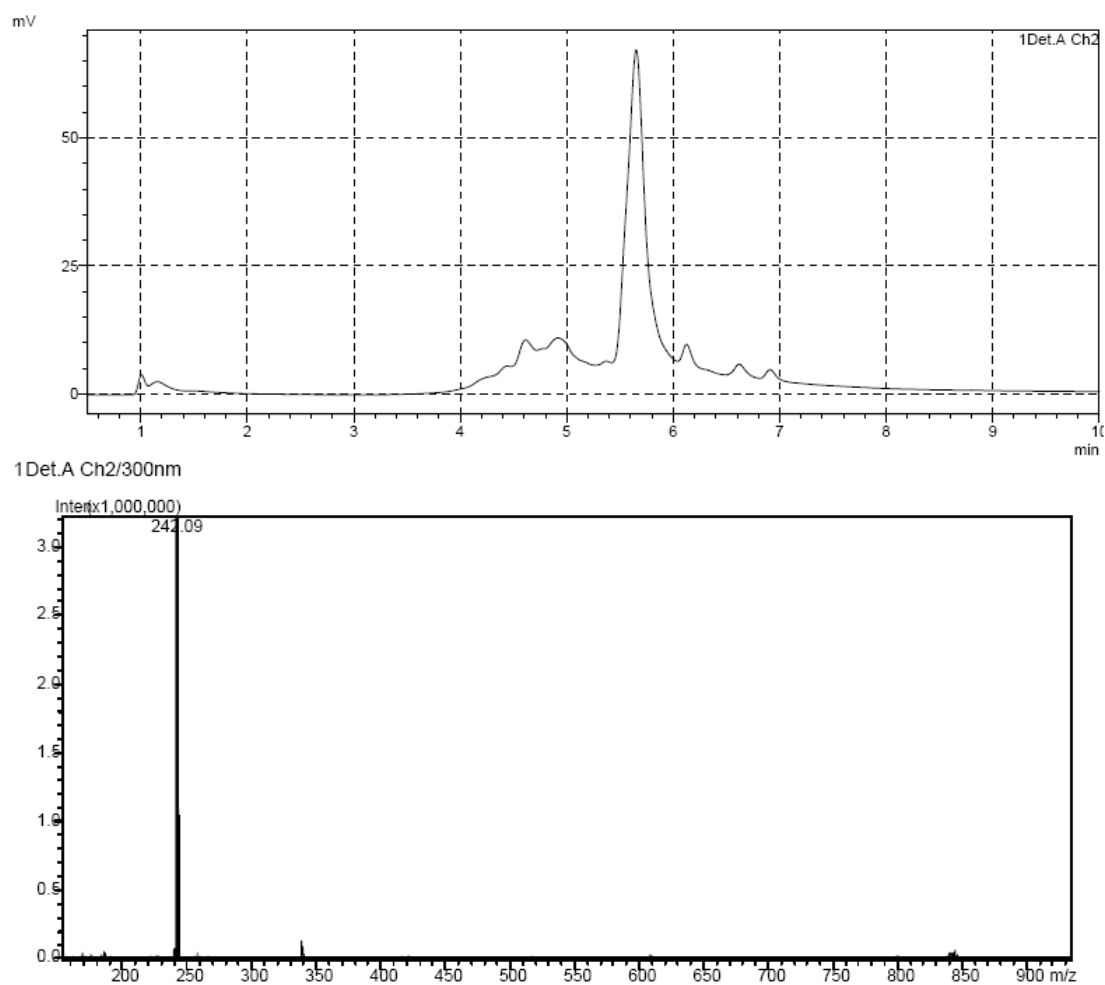



Normalized UV-Vis and Emission Spectra of Compound **9** in MeOH.

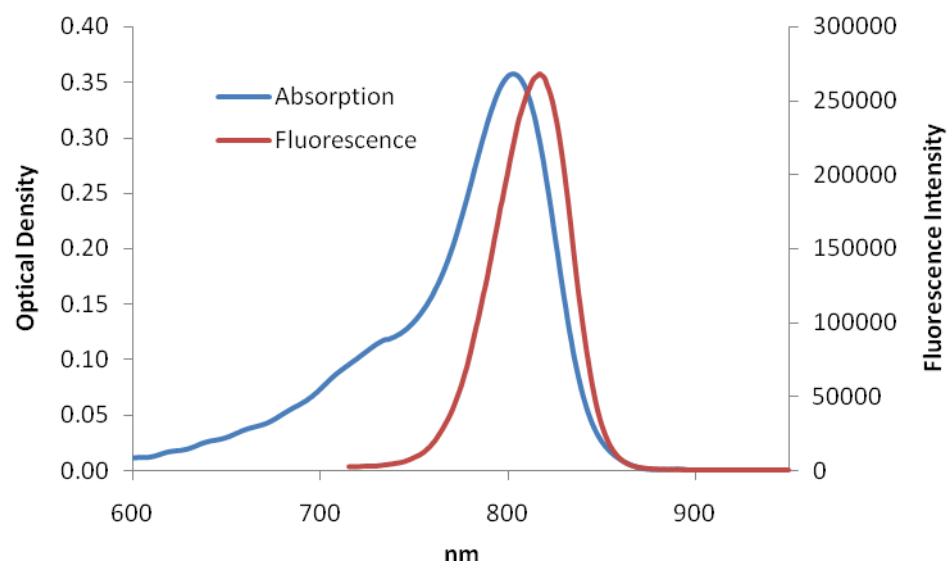

Supplement: Supplementary file 1 [file 4661293]
